# Supplementary material for: High-entropy alloy nanocages with highly ordered {100} facets and ultrathin features for water splitting in an acidic medium
Source: Royal Society of Chemistry journal article supplement (doi:10.1039/d4ta02556c), 2024-01-01
Supplement: d4ta02556c1.pdf [file d4ta02556c1.pdf]

# High-Entropy Alloy Nanocages with Highly Ordered {100} Facets and Ultrathin Feature for Water Splitting in Acidic Medium

*Keying Su, Shan Yang, Yulu Zhu, Yujia Liang, Yawen Tang\*, and Xiaoyu Qiu\**

Jiangsu Key Laboratory of New Power Batteries, Jiangsu Collaborative Innovation Center of Biomedical Functional Materials, School of Chemistry and Materials Science, Nanjing Normal University, Nanjing 210023, China.

\*Corresponding author.

*E-mail address:* [tangyawen@njnu.edu.cn](mailto:tangyawen@njnu.edu.cn) (Y. Tang), [07255@njnu.edu.cn](mailto:07255@njnu.edu.cn) (X. Qiu)

## Figures

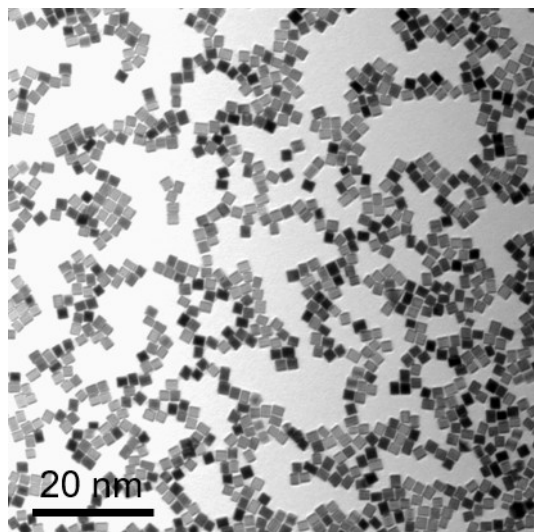

**Figure S1.** TEM images of the sub-18 nm Pd nanocubes.

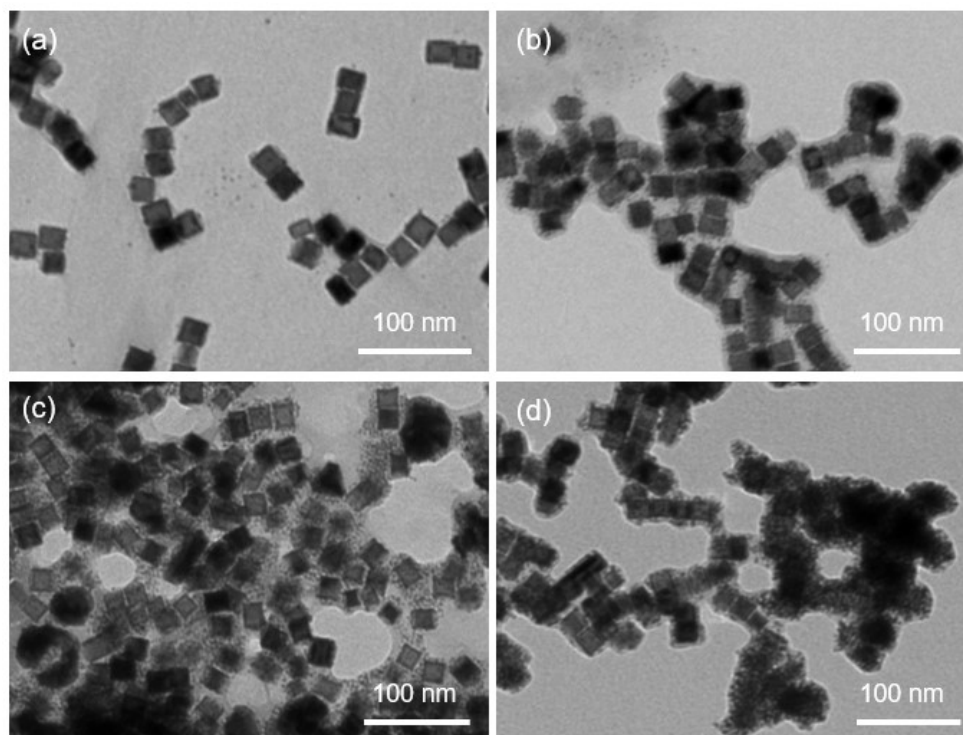

**Figure S2.** TEM images of the Pd@(PtIrRuRh)<sub>5L</sub> core-shell nanocubes recorded at different reaction temperatures: (a) 190 °C; (b) 195 °C; (c) 200 °C; (d) 205 °C.

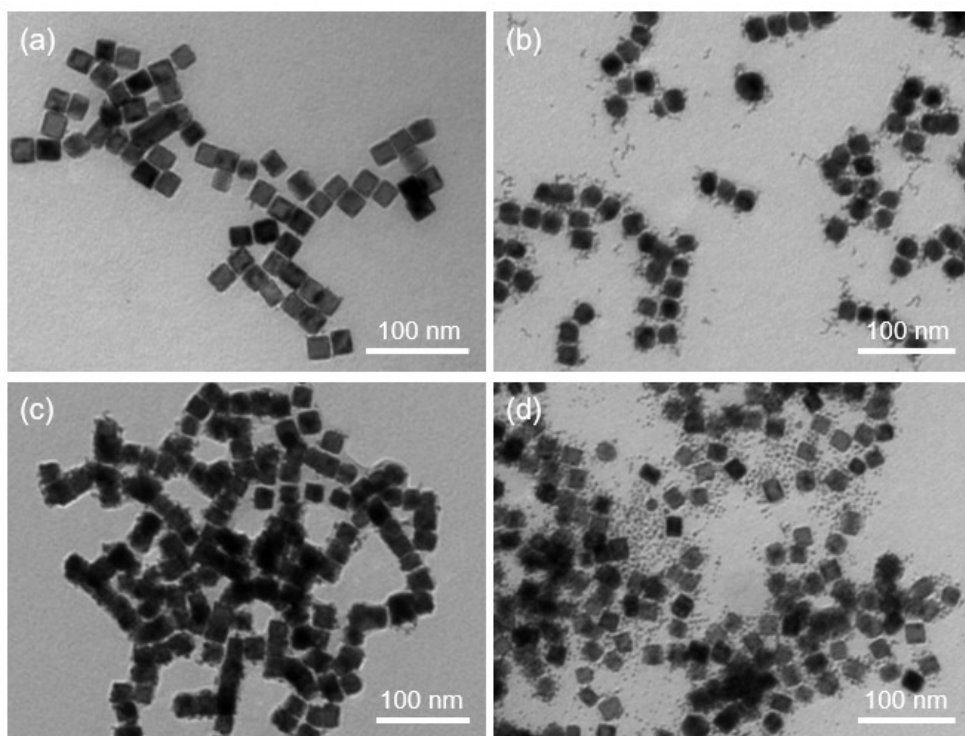

**Figure S3.** TEM images of the Pd@(PtIrRuRh)<sub>5L</sub> core-shell nanocubes prepared at different injection rates: (a) 0.5 mL h<sup>-1</sup>; (b) 1 mL h<sup>-1</sup>; (c) 2 mL h<sup>-1</sup>; (d) 4 mL h<sup>-1</sup>.

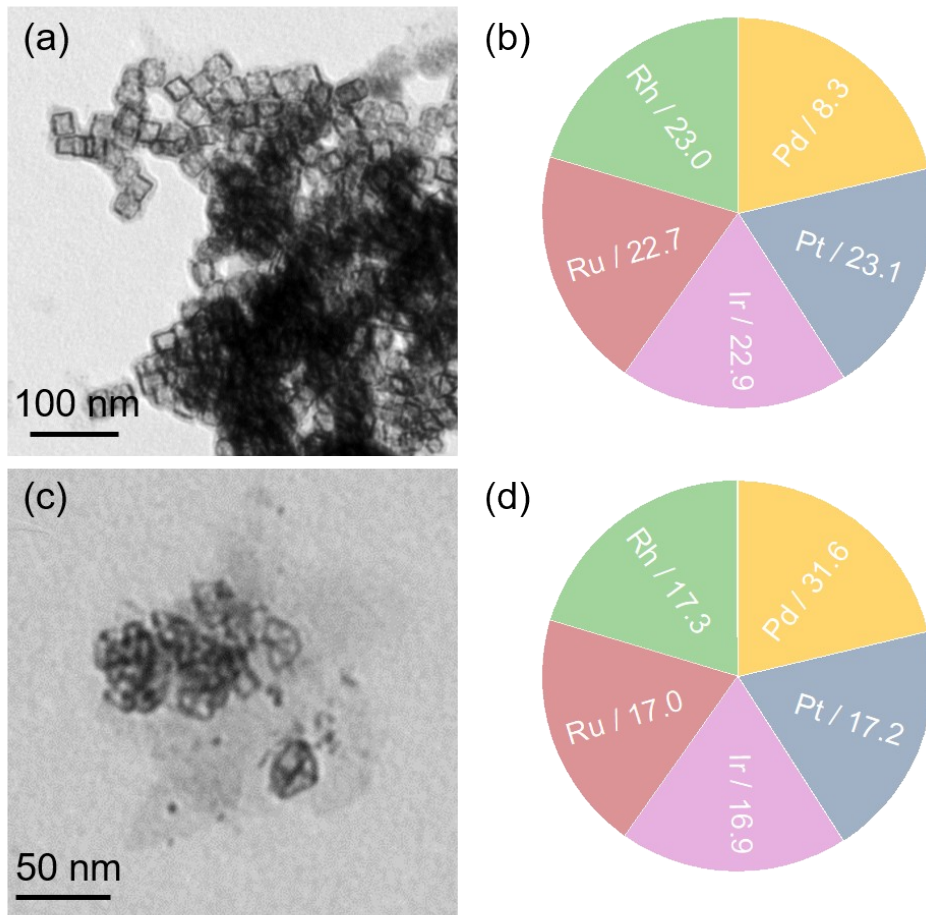

**Figure S4.** TEM images and corresponding metallic compositions of the PtIrRuRhPd HEA CNCs prepared by etching (a-b) the Pd@(PtIrRuRh)<sub>8</sub> layers and (c-d) the Pd@(PtIrRuRh)<sub>3</sub> layers.

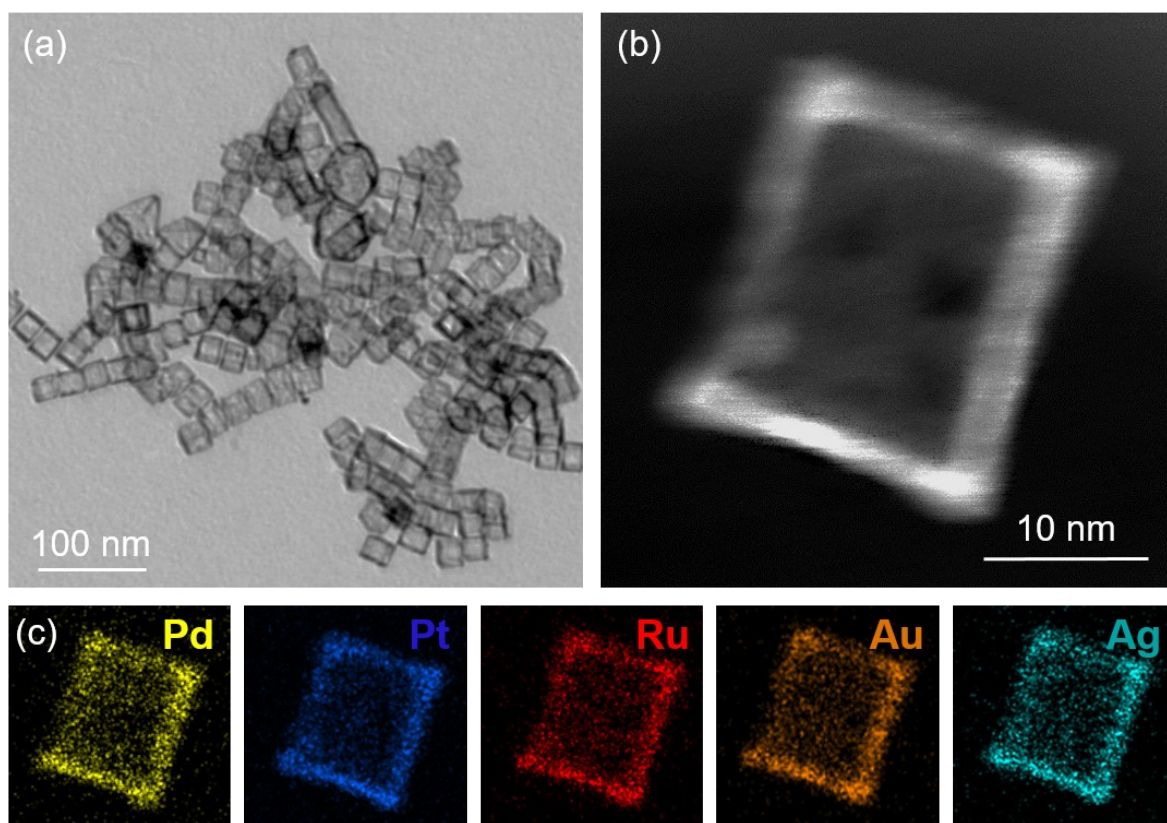

**Figure S5.** (a) TEM image, (b) HAADF-STEM image, and (c) corresponding EDX mapping images of the PtRuAuAgPd HEA CNCs.

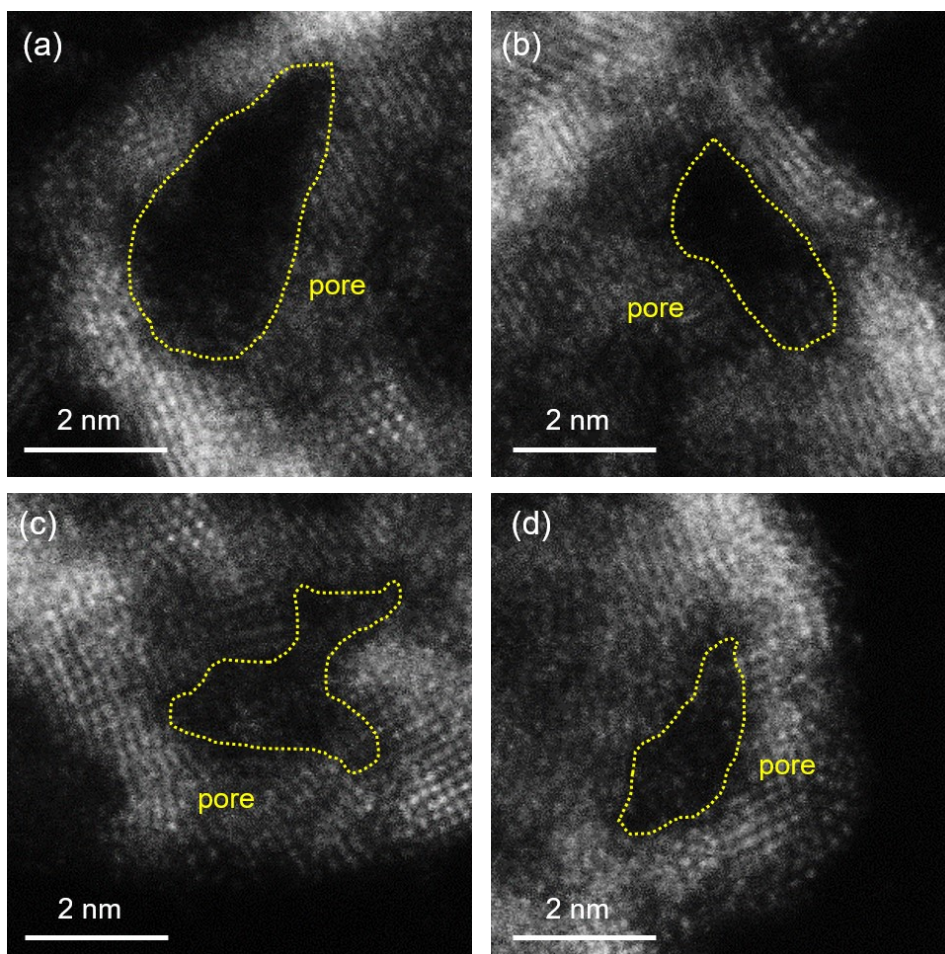

**Figure S6.** AC HADDF-STEM image of the PtIrRuRhPd HEA CNCs, showing the pore distribution in a HEA nanocage.

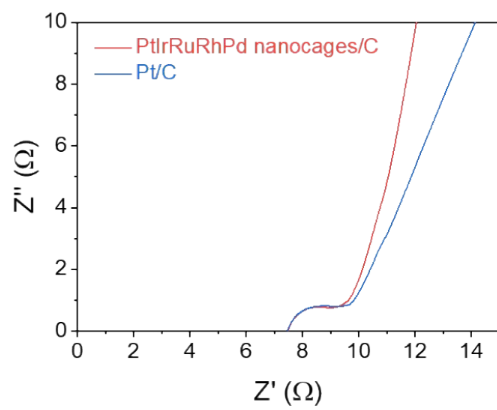

**Figure S7.** Nyquist plots of the PtIrRuRhPd HEA CNCs recorded at -0.45 V vs RHE.



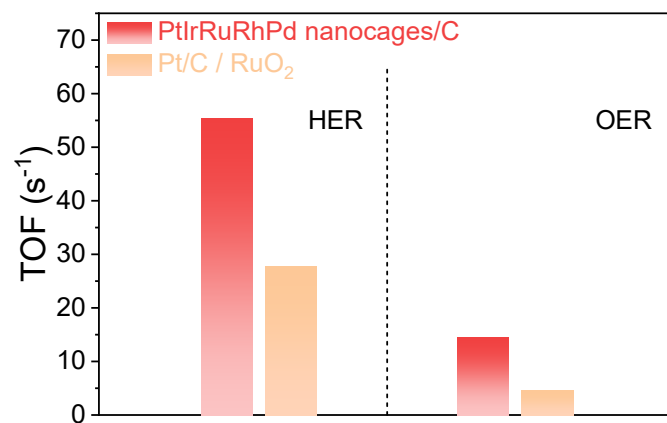

**Figure S8.** Comparisons of the turnover frequencies (TOF) value at  $-0.05 V_{RHE}$  for HER and at  $1.5 V_{RHE}$  for OER.

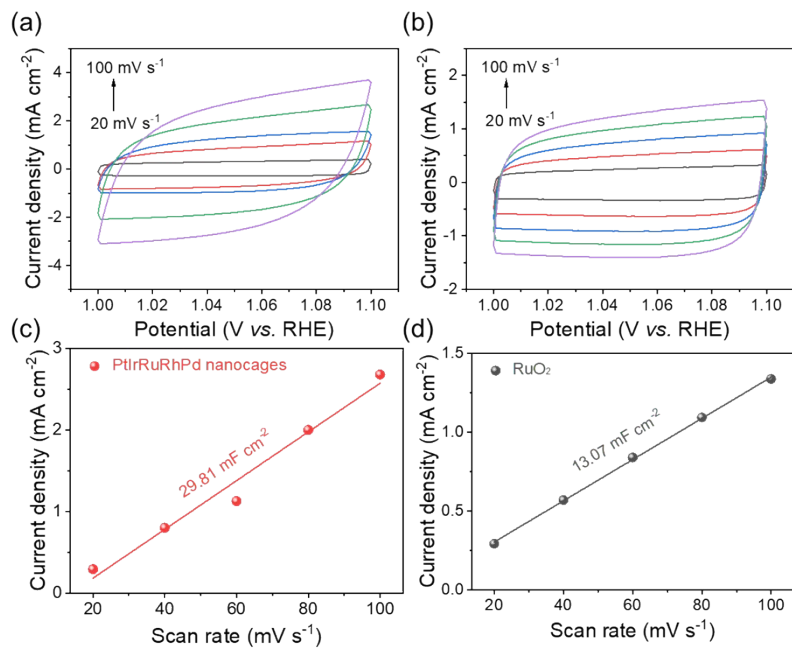

**Figure S9.** CV curves at different scan rates and dependence of the current density for (a, c) PtIrRuRhPd HEA CNCs and (b, d)  $\text{RuO}_2$ . The electrochemical double-layer capacitance ( $C_{dl}$ ) was calculated from the linear fitting.

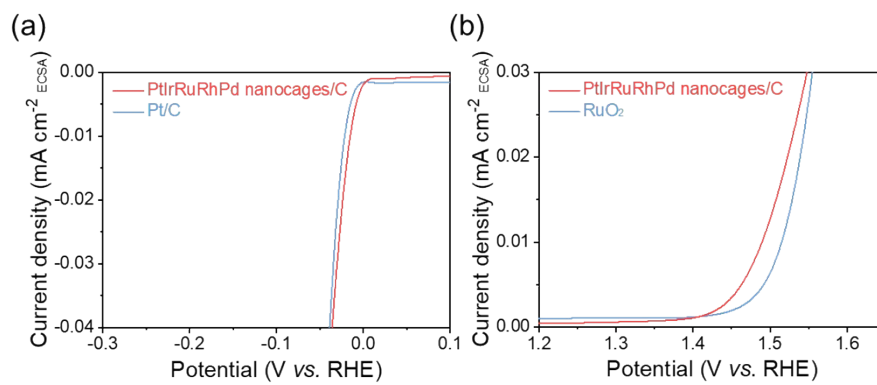

**Figure S10.** Comparisons of the ECSA-normalized (a) HER and (b) OER polarization curves.

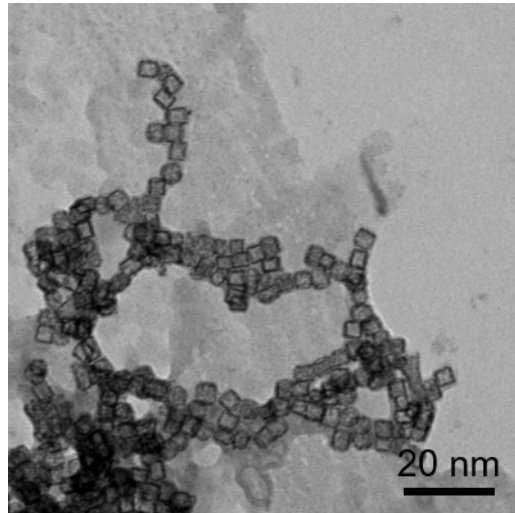

**Figure S11.** TEM image of the PtIrRuRhPd HEA CNCs/C after ADTs.

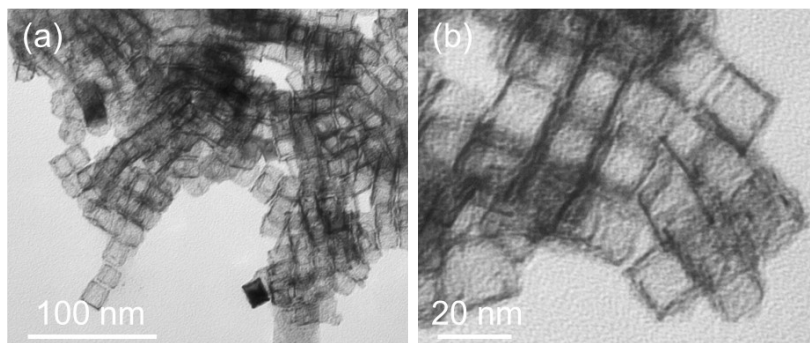

**Figure S12.** TEM images of the PtIrRuRhPd HEA CNCs after water electrolysis for 200,000 s.

**Table S1.** Bifunctional HER and OER activity of PtIrRuRhPd HEA CNCs in acidic media, in comparison with previously reported bifunctional catalysts.

| sample                                   | $\eta_{10}$ for OER (mV) | $\eta_{10}$ for HER (mV) | Tafel slope for OER (mV dec <sup>-1</sup> ) | Tafel slope for HER (mV dec <sup>-1</sup> ) | Reference                                                       |
|------------------------------------------|--------------------------|--------------------------|---------------------------------------------|---------------------------------------------|-----------------------------------------------------------------|
| PtIrRuRhPd HEA CNCs                      | 272                      | 20                       | 83.9                                        | 22.5                                        | <b>This work</b>                                                |
| Pt/C / RuO <sub>2</sub>                  | 325                      | 35                       | 91                                          | 31.2                                        | This work                                                       |
| Au@ AuIr <sub>2</sub>                    | 261                      | 29                       | 58.3                                        | 15.6                                        | <i>J. Am. Chem. Soc.</i> 2021, 143, 4639-4645 <sup>1</sup>      |
| Mn <sub>6</sub> -CoO                     | 322                      | 37                       | 76.8                                        | 122.6                                       | <i>J. Energy Chem.</i> 2022, 71, 639-651 <sup>2</sup>           |
| RuO <sub>2</sub> NWs/C                   | 224                      | 45                       | 48                                          | 61.5                                        | <i>Adv. Funct. Mater.</i> 2021, 31, 2007344 <sup>3</sup>        |
| LN-Ru                                    | 196                      | 35                       | 51                                          | 30                                          | <i>Appl. Catal. B</i> 2022, 316, 121682 <sup>4</sup>            |
| Au <sub>0.5</sub> Ir <sub>0.5</sub> @CNT | 257                      | 27                       | 77.6                                        | 37.0                                        | <i>J. Mater. Chem. A</i> 2020, 8, 20168-20174 <sup>5</sup>      |
| a-RuTe <sub>2</sub> PNRs                 | 245                      | 33                       | 47                                          | 35                                          | <i>Nat. Commun.</i> 2019, 10, 5692 <sup>6</sup>                 |
| Ir-NR/C                                  | 290                      | 28                       | 72.4                                        | 23.5                                        | <i>Appl. Catal. B</i> 2020, 279, 119394 <sup>7</sup>            |
| SrIrO-1100                               | 263                      | 18                       | 49.7                                        | 30.6                                        | <i>Chem. Eng. J.</i> 2021, 419, 129604 <sup>8</sup>             |
| RuIrTe NTs                               | 205                      | 29                       | 41.2                                        | 30.6                                        | <i>J. Mater. Chem. A</i> 2022, 10, 2021-2026 <sup>9</sup>       |
| Ru@MoO(S) <sub>3</sub>                   | 226                      | 63                       | 51                                          | 32                                          | <i>Nano Energy</i> 2022, 100, 107445 <sup>10</sup>              |
| RuO <sub>2</sub> -WC NPs                 | 347                      | 58                       | 88.5                                        | 66                                          | <i>Angew. Chem. Int. Ed.</i> 2022, 61, e202202519 <sup>11</sup> |

1. H. Wang, Z. N. Chen, D. Wu, M. Cao, F. Sun, H. Zhang, H. You, W. Zhuang and R. Cao, *J. Am. Chem. Soc.*, 2021, **143**, 4639-4645.
2. H. Xue, A. Meng, T. Yang, Z. Li and C. Chen, *J. Energy Chem.*, 2022, **71**, 639-651.
3. L. Chen, Y. Li and X. Liang, *Adv. Funct. Mater.*, 2021, **31**, 2007344.
4. R. Jiang, Y. Da, J. Zhang, H. Wu, B. Fan, J. Li, J. Wang, Y. Deng, X. Han and W. Hu, *Appl. Catal. B: Environ.*, 2022, **316**, 121682.
5. H. Hu, F. M. D. Kazim, Z. Ye, Y. Xie, Q. Zhang, K. Qu, J. Xu, W. Cai, S. Xiao and Z. Yang, *J. Mater. Chem. A*, 2020, **8**, 20168-20174.
6. J. Wang, L. Han, B. Huang, Q. Shao, H. L. Xin and X. Huang, *Nat. Commun.*, 2019, **10**, 5692.
7. F. Luo, L. Guo, Y. Xie, J. Xu, K. Qu and Z. Yang, *Appl. Catal. B: Environ.*, 2020, **279**, 119394.
8. L. Zhang, H. Jang, Z. Li, H. Liu, M. G. Kim, X. Liu and J. Cho, *Chem. Eng. J.*, 2021, **419**, 129604.
9. M. Liu, S. Liu, Q. Mao, S. Yin, Z. Wang, Y. Xu, X. Li, L. Wang and H. Wang, *J. Mater. Chem. A*, 2022, **10**, 2021-2026.
10. D. Chen, R. Yu, D. Wu, H. Zhao, P. Wang, J. Zhu, P. Ji, Z. Pu, L. Chen, J. Yu and S. Mu, *Nano Energy*, 2022, **100**, 107445.
11. S. C. Sun, H. Jiang, Z. Y. Chen, Q. Chen, M. Y. Ma, L. Zhen, B. Song and C. Y. Xu, *Angew. Chem. Int. Ed.*, 2022, **61**, e202202519.
